# Supplementary material for: Pressure induced structural, electronic and optical properties of CsPbI3 perovskite
Source: Royal Society of Chemistry journal article supplement (doi:10.1039/d4nj03714f), 2024-01-01
Supplement: d4nj03714f1.pdf [file d4nj03714f1.pdf]

## Supplementary Information

### Pressure Induced Structural, Electronic and Optical Properties of CsPbI<sub>3</sub> Perovskite

Dibyajyoti Saikia<sup>1</sup>, Mahfooz Alam<sup>2</sup>, Chayan Das<sup>1</sup>, Atanu Betal<sup>1</sup>, Appala Naidu Gandhi<sup>2</sup>, Satyajit Sahu<sup>1</sup>

<sup>1</sup>Department of Physics, Indian Institute of Technology Jodhpur, Jodhpur, India 342030

<sup>2</sup>Department of Metallurgical and Materials Engineering, Indian Institute of Technology Jodhpur, Jodhpur, India 342030

#### Optical properties calculation:

The optical properties were evaluated from the dielectric function  $\varepsilon(\omega)$  given by,

$$\varepsilon(\omega) = \varepsilon_r(\omega) + i\varepsilon_i(\omega)$$

Here  $\varepsilon_r(\omega)$  and  $\varepsilon_i(\omega)$  denote the real and imaginary part of the dielectric constant. Optical characteristics such as absorption coefficient  $\alpha(\omega)$ , optical conductivity  $\sigma(\omega)$ , reflectance  $R(\omega)$ , energy-loss function  $L(\omega)$ , extinction coefficient  $k(\omega)$  and refractive index  $n(\omega)$  can be computed from  $\varepsilon_r(\omega)$  and  $\varepsilon_i(\omega)$  as follows:

$$\alpha(\omega) = \sqrt{2}[\sqrt{\varepsilon_r^2(\omega) + \varepsilon_i^2(\omega)} - \varepsilon_r(\omega)]^{1/2}$$

$$\sigma(\omega) = -\frac{i\omega}{4\pi} \varepsilon(\omega)$$

$$R(\omega) = \left| \frac{\sqrt{\varepsilon(\omega)} - 1}{\sqrt{\varepsilon(\omega)} + 1} \right|^2$$

$$L(\omega) = \frac{\varepsilon_i(\omega)}{\varepsilon_r^2(\omega) + \varepsilon_i^2(\omega)}$$

$$K(\omega) = \frac{[\sqrt{\varepsilon_r^2(\omega) + \varepsilon_i^2(\omega)} - \varepsilon_r(\omega)]^{1/2}}{2}$$

$$n(\omega) = \frac{[\sqrt{\varepsilon_r^2(\omega) + \varepsilon_i^2(\omega)} + \varepsilon_r(\omega)]^{1/2}}{2}$$

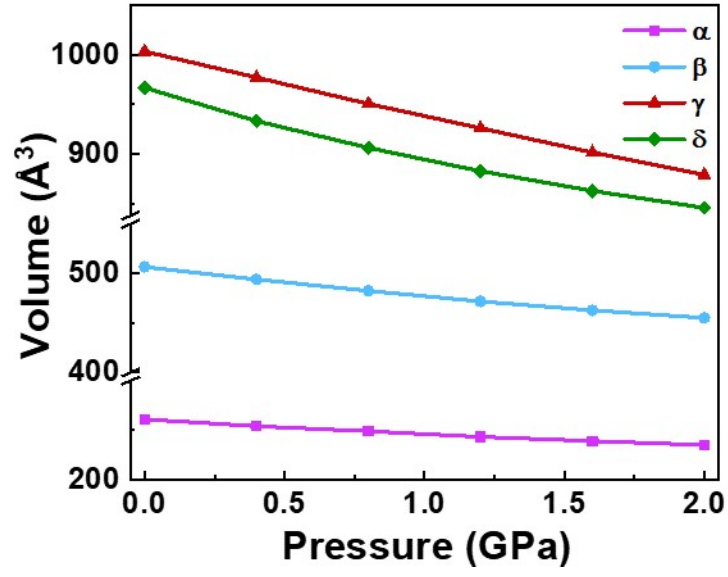

**Figure S1.** Variation of unit cell volume of  $\alpha$ -,  $\beta$ -,  $\gamma$ - and  $\delta$ -CsPbI<sub>3</sub> perovskite with applied pressure.

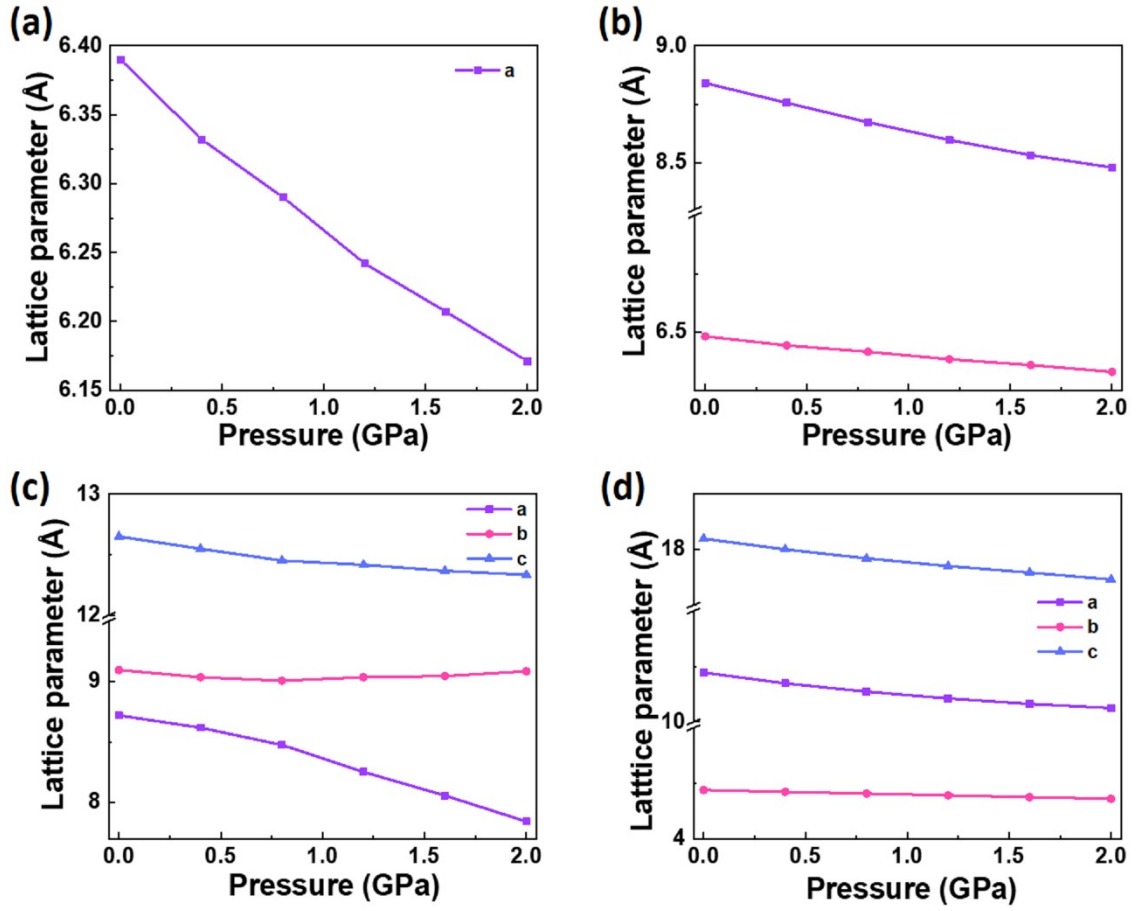

**Figure S2.** Lattice parameter evolution as a function of applied pressure: (a)  $\alpha$ -, (b)  $\beta$ - (c)  $\gamma$ - and (d)  $\delta$ -phases of CsPbI<sub>3</sub>.

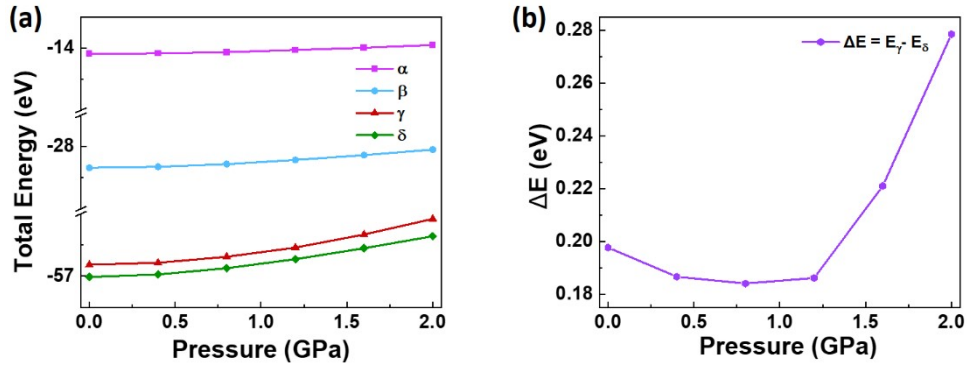

**Figure S3.** (a) Computed total energy of unit cells for  $\alpha$ -,  $\beta$ -,  $\gamma$ -, and  $\delta$ -phases of CsPbI<sub>3</sub> and (b) Total energy difference between the unit cells of  $\gamma$ - and  $\delta$ -CsPbI<sub>3</sub> ( $\Delta E = E_{\gamma} - E_{\delta}$ ) as a function of applied pressure.

**Table S1.** Calculated lattice parameters of CsPbI<sub>3</sub> polymorphs with pressure using PBE functional.

| Pressure<br>(GPa) | $\alpha$ | $\beta$  |          | $\gamma$ |          |          | $\delta$ |          |          |
|-------------------|----------|----------|----------|----------|----------|----------|----------|----------|----------|
|                   | <i>a</i> | <i>a</i> | <i>c</i> | <i>a</i> | <i>b</i> | <i>c</i> | <i>a</i> | <i>b</i> | <i>c</i> |
| 0                 | 6.39     | 8.841    | 6.481    | 8.72     | 9.096    | 12.651   | 10.891   | 4.877    | 18.20    |
| 0.4               | 6.332    | 8.756    | 6.442    | 8.618    | 9.036    | 12.549   | 10.696   | 4.845    | 18.006   |
| 0.8               | 6.29     | 8.673    | 6.415    | 8.475    | 9.007    | 12.452   | 10.547   | 4.815    | 17.845   |
| 1.2               | 6.242    | 8.597    | 6.383    | 8.252    | 9.036    | 12.417   | 10.424   | 4.782    | 17.706   |
| 1.6               | 6.207    | 8.532    | 6.358    | 8.057    | 9.046    | 12.367   | 10.324   | 4.75     | 17.588   |
| 2                 | 6.171    | 8.479    | 6.329    | 7.842    | 9.085    | 12.334   | 10.251   | 4.722    | 17.463   |

**Table S2.** Calculated band gaps of  $\alpha$ -,  $\beta$ -, and  $\gamma$ -phases of CsPbI<sub>3</sub> as a function of pressure using PBE functional with and without SOC consideration.

| Pressure<br>(GPa) | $\alpha$ |         | $\beta$ |         | $\gamma$ |         |
|-------------------|----------|---------|---------|---------|----------|---------|
|                   | PBE      | PBE+SOC | PBE     | PBE+SOC | PBE      | PBE+SOC |
| 0                 | 1.4782   | 0.3688  | 1.5808  | 0.6675  | 1.8070   | 0.8379  |
| 0.4               | 1.3982   | 0.2980  | 1.5196  | 0.6389  | 1.7791   | 0.8492  |
| 0.8               | 1.3361   | 0.2410  | 1.4715  | 0.6336  | 1.7666   | 0.8492  |
| 1.2               | 1.2572   | 0.1698  | 1.4131  | 0.6084  | 1.7663   | 0.8794  |
| 1.6               | 1.1971   | 0.1139  | 1.3592  | 0.5841  | 1.7766   | 0.9160  |
| 2                 | 1.1329   | 0.0541  | 1.3043  | 0.5479  | 1.7977   | 0.9632  |

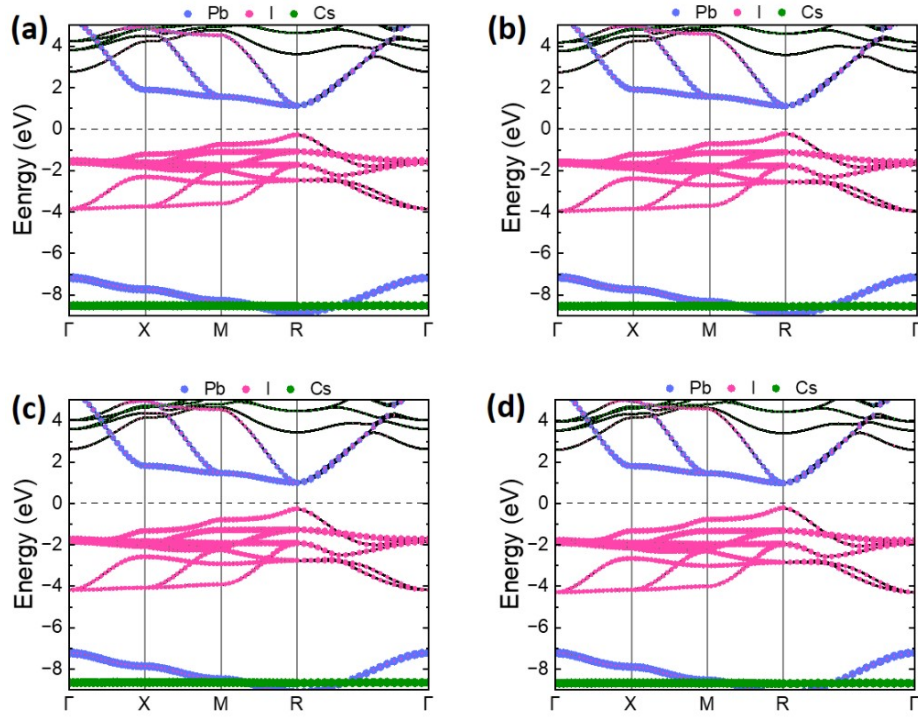

**Figure S4.** Calculated projected band structures of  $\alpha$ -CsPbI<sub>3</sub> with applied pressure: (a) 0.4 GPa, (b) 0.8 GPa, (c) 1.2 GPa and (d) 1.6 GPa.

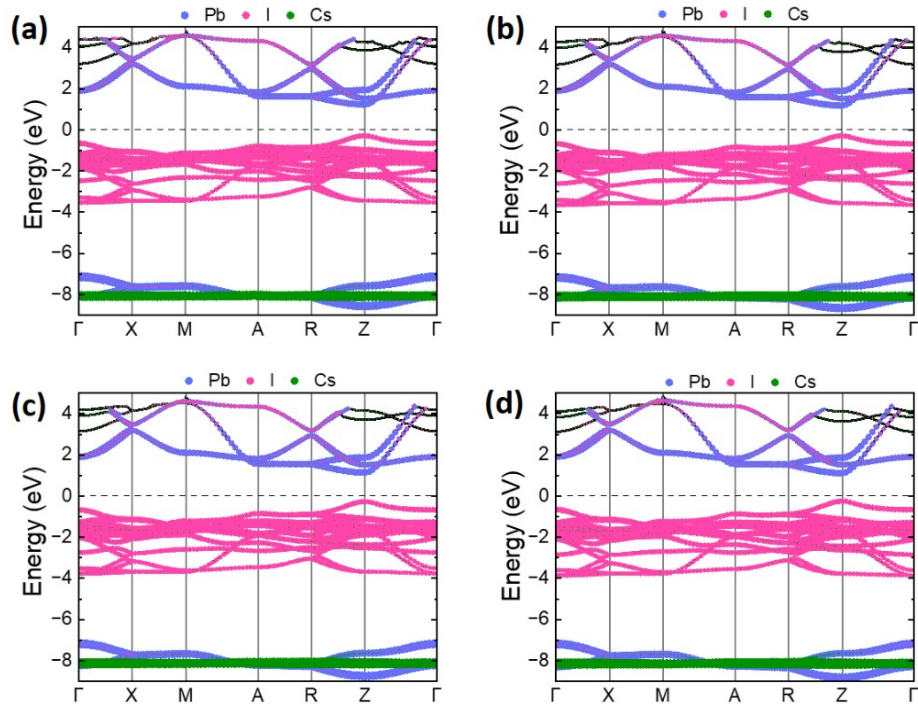

**Figure S5.** Calculated projected band structures of  $\beta$ -CsPbI<sub>3</sub> with applied pressure: (a) 0.4 GPa, (b) 0.8 GPa, (c) 1.2 GPa and (d) 1.6 GPa.

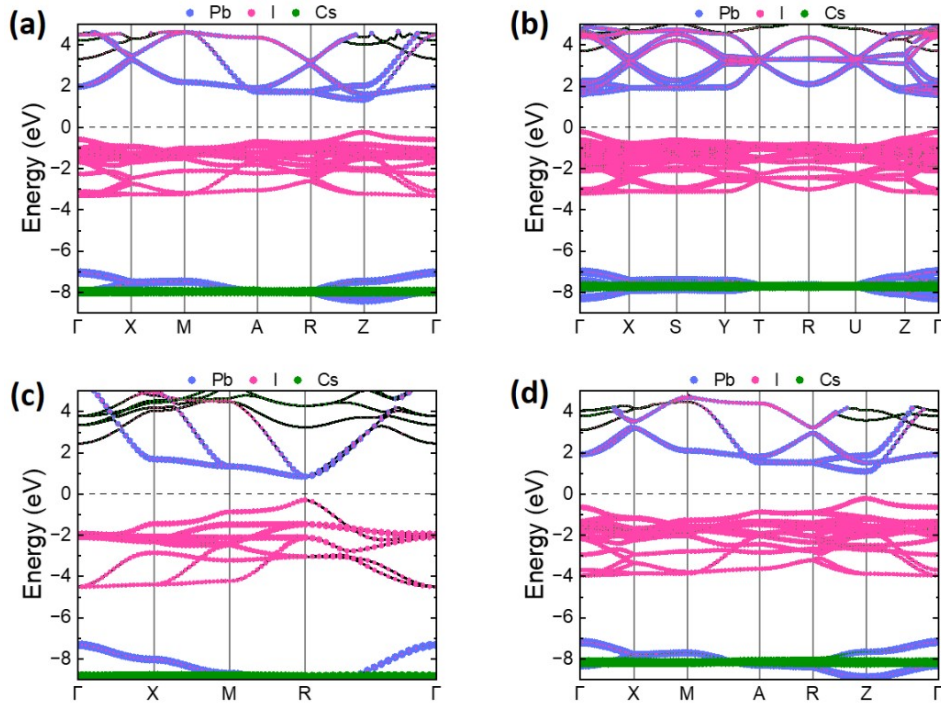

**Figure S6.** Calculated projected band structures of  $\gamma$ -CsPbI<sub>3</sub> with applied pressure: (a) 0.4 GPa, (b) 0.8 GPa, (c) 1.2 GPa and (d) 1.6 GPa.

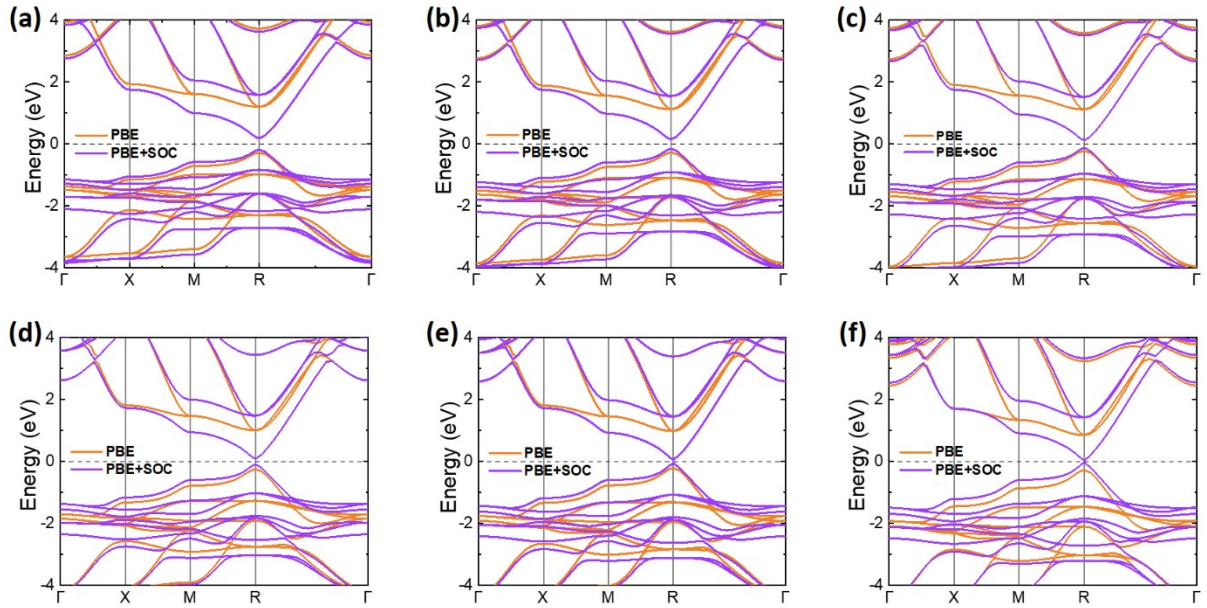

**Figure S7.** Computed band structures of  $\alpha$ -CsPbI<sub>3</sub> with and without SOC effect at various applied pressures: (a) 0 GPa, (b) 0.4 GPa, (c) 0.8 GPa, (d) 1.2 GPa, (e) 1.6 GPa and (f) 2 GPa



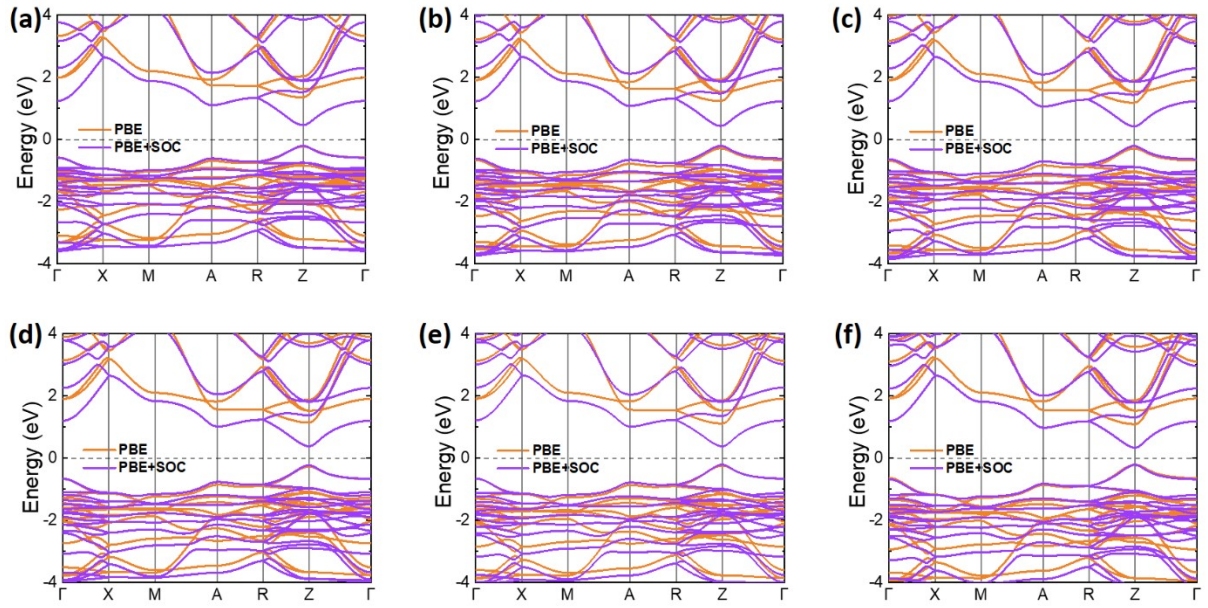

**Figure S8.** Computed band structures of  $\beta$ -CsPbI<sub>3</sub> with and without SOC effect at various applied pressures: (a) 0 GPa, (b) 0.4 GPa, (c) 0.8 GPa, (d) 1.2 GPa, (e) 1.6 GPa and (f) 2 GPa

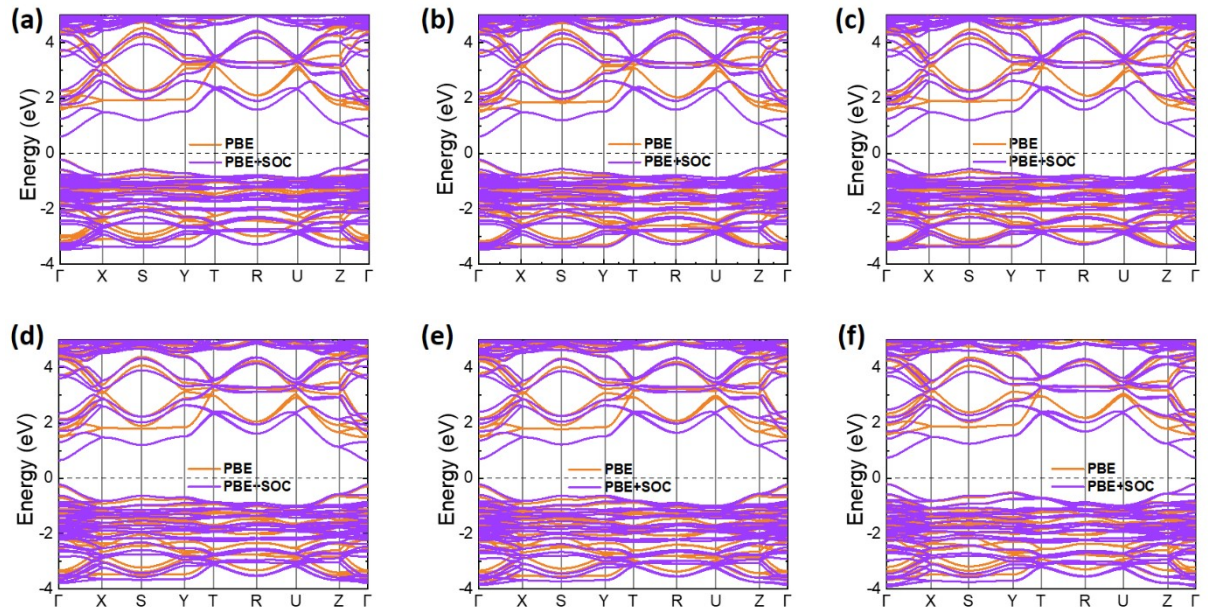

**Figure S9.** Computed band structures of  $\gamma$ -CsPbI<sub>3</sub> with and without SOC effect at various applied pressures: (a) 0 GPa, (b) 0.4 GPa, (c) 0.8 GPa, (d) 1.2 GPa, (e) 1.6 GPa and (f) 2 GPa

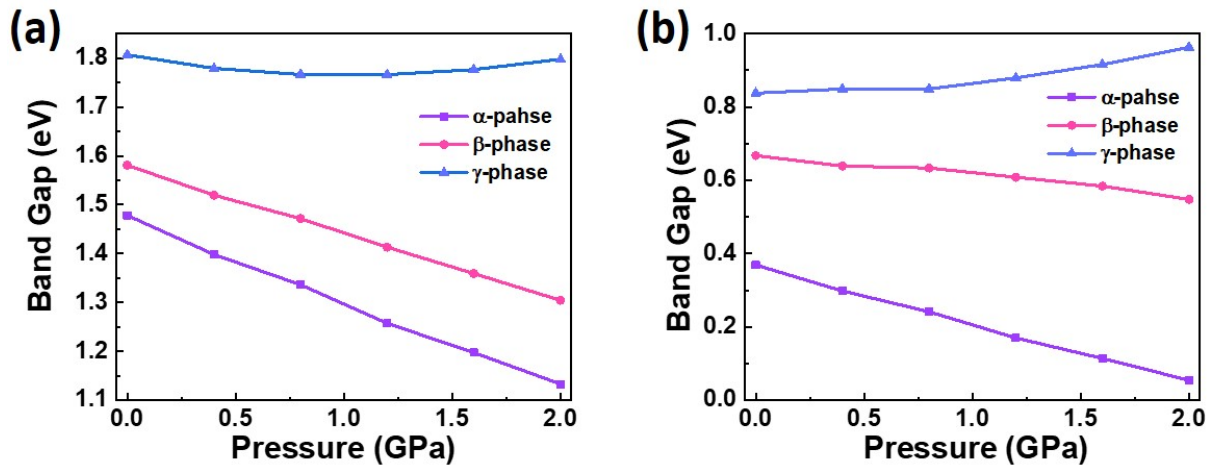

**Figure S10.** Variation of band gap (a) without and (b) with SOC effect as a function of applied pressure

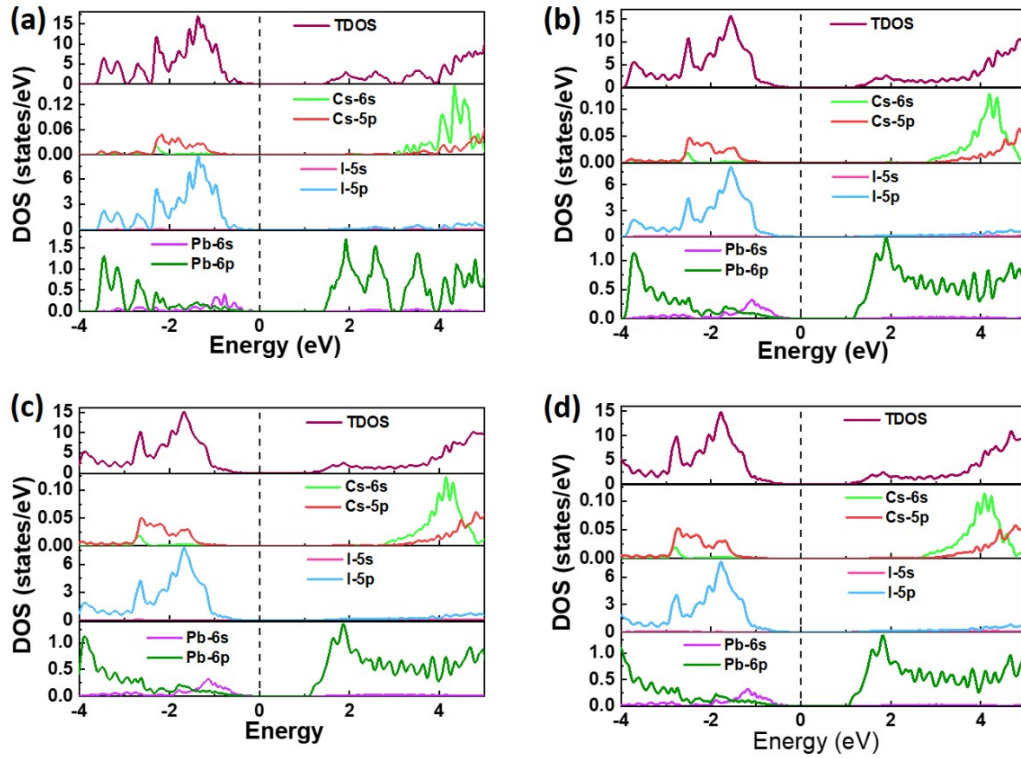

**Figure S11.** Computed PDOS of  $\alpha$ -CsPbI<sub>3</sub> with applied pressure: (a) 0.4 GPa, (b) 0.8 GPa, (c) 1.2 GPa and (d) 1.6 GPa.

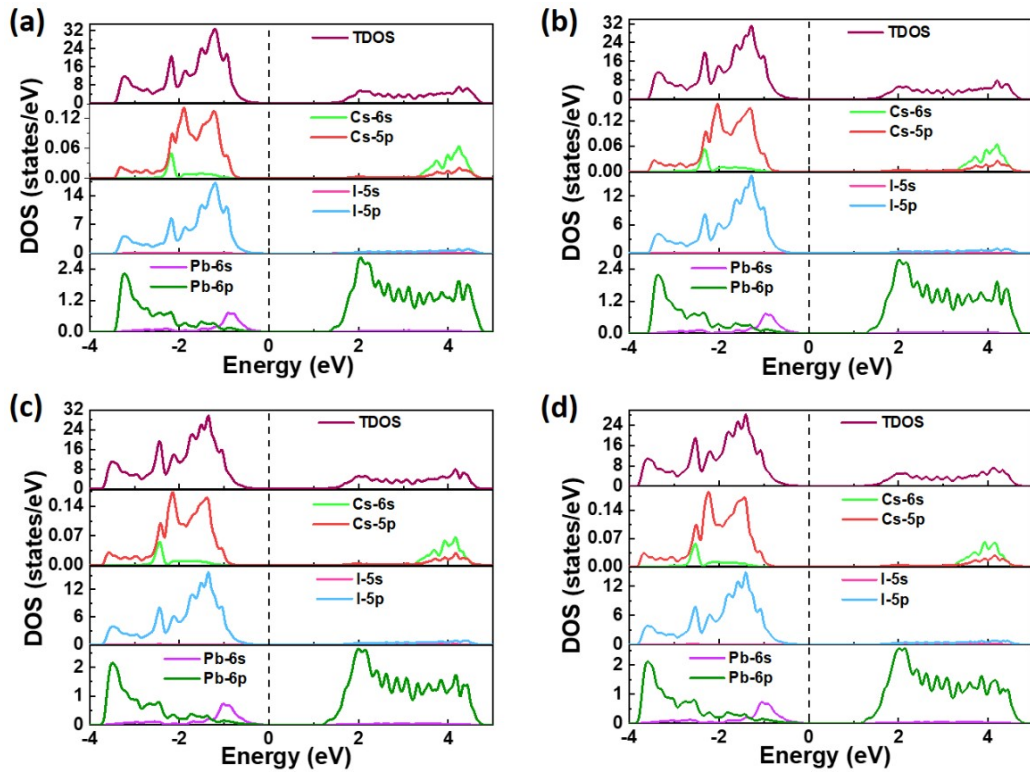

**Figure S12.** Computed PDOS of  $\beta$ -CsPbI<sub>3</sub> with applied pressure: (a) 0.4 GPa, (b) 0.8 GPa, (c) 1.2 GPa and (d) 1.6 GPa.

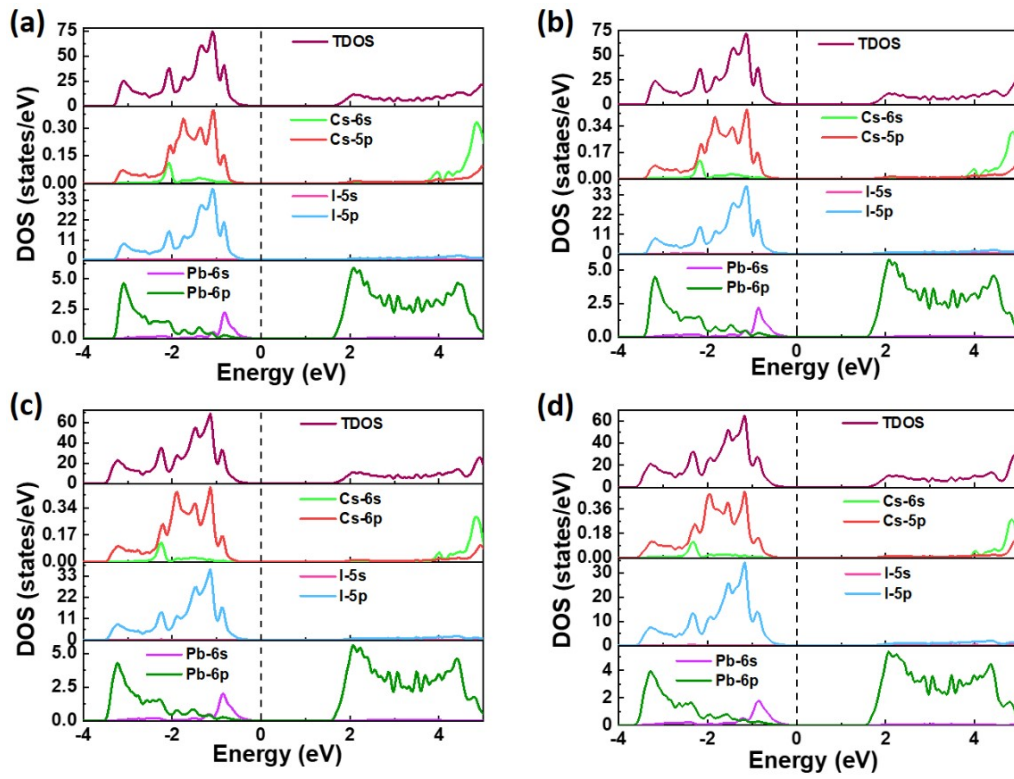

**Figure S13.** Computed PDOS of  $\gamma$ -CsPbI<sub>3</sub> with applied pressure: (a) 0.4 GPa, (b) 0.8 GPa, (c) 1.2 GPa and (d) 1.6 GPa.



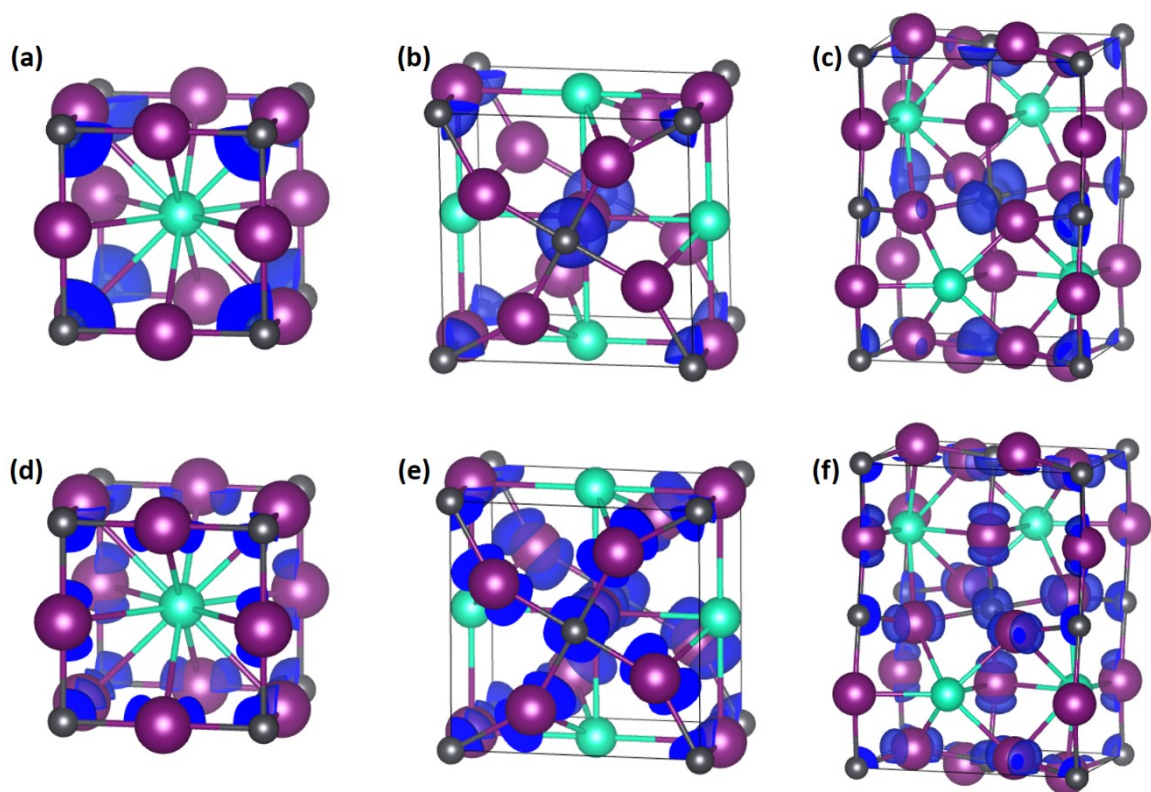

**Figure S14.** Computed charge densities at CBM (upper row) and VBM (bottom row) for  $\alpha$ -(a, d),  $\beta$ -(b, e), and  $\gamma$ -(c, f) phases of CsPbI<sub>3</sub> at 0 GPa.
